# Supplementary material
Source: PubMed Central journal article supplement (PMC2944498)
Supplement: supp_192_19_5002__1.pdf [file supp_192_19_5002__1.pdf]

Table S1. Source for 633 16S rRNA gene sequence libraries.

| Cloning Series | Study <sup>a</sup>       | Site        | Reference |
|----------------|--------------------------|-------------|-----------|
| _C             | ANUG                     | Subgingival | (7)       |
| _D             | ANUG                     | Subgingival | (7)       |
| _F             | Refractory Periodontitis | Subgingival | (13)      |
| _G             | Refractory Periodontitis | Subgingival | (7)       |
| _G             | ANUG                     | Subgingival | (13)      |
| _I             | Refractory Periodontitis | Subgingival | (13)      |
| _K             | Periodontitis HIV +      | Subgingival | (13)      |
| _R             | ANUG                     | Subgingival | (13)      |
| _T             | ANUG                     | Subgingival | (7)       |
| _U             | ANUG                     | Subgingival | (7)       |
| _W             | ANUG                     | Subgingival | (7)       |
| _X             | ANUG                     | Subgingival | (13)      |
| _Y             | ANUG                     | Subgingival | (7)       |
| _Z             | ANUG                     | Subgingival | (13)      |
| AA             | ANUG                     | Subgingival | (13)      |
| AB             | ANUG                     | Subgingival | (13)      |
| AE             | ANUG                     | Subgingival | (7)       |
| AF             | ANUG                     | Subgingival | (7)       |
| AG             | ANUG                     | Subgingival | (13)      |
| AH             | Refractory Periodontitis | Subgingival | (13)      |
| AJ             | Refractory Periodontitis | Subgingival | (13)      |
| AK             | Refractory Periodontitis | Subgingival | (13)      |
| AN             | Refractory Periodontitis | Subgingival | (7)       |
| AO             | Refractory Periodontitis | Subgingival | (13)      |
| AP             | Refractory Periodontitis | Subgingival | (13)      |

|         |                          |             |      |
|---------|--------------------------|-------------|------|
| AQ      | Refractory Periodontitis | Subgingival | (13) |
| AT      | Refractory Periodontitis | Subgingival | (7)  |
| ATC_A11 | Caries                   | Tooth       | (9)  |
| ATC_A14 | Caries                   | Tooth       | (9)  |
| ATC_A15 | Caries                   | Tooth       | (9)  |
| ATC_A18 | Caries                   | Tooth       | (9)  |
| ATC_A21 | Caries                   | Tooth       | (9)  |
| ATC_A3  | Caries                   | Tooth       | (9)  |
| ATC_A37 | Caries                   | Tooth       | (9)  |
| ATC_A44 | Caries                   | Tooth       | (9)  |
| ATC_A51 | Caries                   | Tooth       | (9)  |
| ATC_A54 | Caries                   | Tooth       | (9)  |
| ATC_A6  | Caries                   | Tooth       | (9)  |
| ATC_A60 | Caries                   | Tooth       | (9)  |
| ATC_A62 | Caries                   | Tooth       | (9)  |
| ATC_A64 | Caries                   | Tooth       | (9)  |
| ATC_A69 | Caries                   | Tooth       | (9)  |
| ATC_A7  | Caries                   | Tooth       | (9)  |
| ATC_A70 | Caries                   | Tooth       | (9)  |
| ATC_A72 | Caries                   | Tooth       | (9)  |
| ATC_A75 | Caries                   | Tooth       | (9)  |
| ATC_A78 | Caries                   | Tooth       | (9)  |
| ATC_A8  | Caries                   | Tooth       | (9)  |
| ATC_A82 | Caries                   | Tooth       | (9)  |
| ATC_A84 | Caries                   | Tooth       | (9)  |
| ATC_A85 | Caries                   | Tooth       | (9)  |
| ATC_A87 | Caries                   | Tooth       | (9)  |

|          |        |       |     |
|----------|--------|-------|-----|
| ATC_H105 | Caries | Tooth | (9) |
| ATC_H107 | Caries | Tooth | (9) |
| ATC_H109 | Caries | Tooth | (9) |
| ATC_H11  | Caries | Tooth | (9) |
| ATC_H111 | Caries | Tooth | (9) |
| ATC_H112 | Caries | Tooth | (9) |
| ATC_H13  | Caries | Tooth | (9) |
| ATC_H17  | Caries | Tooth | (9) |
| ATC_H21  | Caries | Tooth | (9) |
| ATC_H22  | Caries | Tooth | (9) |
| ATC_H23  | Caries | Tooth | (9) |
| ATC_H25  | Caries | Tooth | (9) |
| ATC_H26  | Caries | Tooth | (9) |
| ATC_H29  | Caries | Tooth | (9) |
| ATC_H30  | Caries | Tooth | (9) |
| ATC_H300 | Caries | Tooth | (9) |
| ATC_H301 | Caries | Tooth | (9) |
| ATC_H302 | Caries | Tooth | (9) |
| ATC_H303 | Caries | Tooth | (9) |
| ATC_H304 | Caries | Tooth | (9) |
| ATC_H307 | Caries | Tooth | (9) |
| ATC_H32  | Caries | Tooth | (9) |
| ATC_H36  | Caries | Tooth | (9) |
| ATC_H37  | Caries | Tooth | (9) |
| ATC_H38  | Caries | Tooth | (9) |
| ATC_H41  | Caries | Tooth | (9) |
| ATC_H47  | Caries | Tooth | (9) |

|         |        |       |     |
|---------|--------|-------|-----|
| ATC_H49 | Caries | Tooth | (9) |
| ATC_H50 | Caries | Tooth | (9) |
| ATC_H52 | Caries | Tooth | (9) |
| ATC_H66 | Caries | Tooth | (9) |
| ATC_H67 | Caries | Tooth | (9) |
| ATC_H73 | Caries | Tooth | (9) |
| ATC_H74 | Caries | Tooth | (9) |
| ATC_H76 | Caries | Tooth | (9) |
| ATC_H80 | Caries | Tooth | (9) |
| ATC_H94 | Caries | Tooth | (9) |
| ATC_T1  | Caries | Tooth | (9) |
| ATC_T10 | Caries | Tooth | (9) |
| ATC_T11 | Caries | Tooth | (9) |
| ATC_T12 | Caries | Tooth | (9) |
| ATC_T13 | Caries | Tooth | (9) |
| ATC_T14 | Caries | Tooth | (9) |
| ATC_T15 | Caries | Tooth | (9) |
| ATC_T16 | Caries | Tooth | (9) |
| ATC_T17 | Caries | Tooth | (9) |
| ATC_T2  | Caries | Tooth | (9) |
| ATC_T20 | Caries | Tooth | (9) |
| ATC_T3  | Caries | Tooth | (9) |
| ATC_T34 | Caries | Tooth | (9) |
| ATC_T4  | Caries | Tooth | (9) |
| ATC_T5  | Caries | Tooth | (9) |
| ATC_T6  | Caries | Tooth | (9) |
| ATC_T7  | Caries | Tooth | (9) |

|        |                          |                                  |             |
|--------|--------------------------|----------------------------------|-------------|
| ATC_T9 | Caries                   | Tooth                            | (9)         |
| AU     | Refractory Periodontitis | Subgingival                      | (13)        |
| AV     | Noma                     | Subgingival                      | (14)(14)    |
| AW     | Noma                     | Subgingival                      | (14)        |
| AX     | Refractory Periodontitis | Subgingival                      | (13)        |
| AY     | Periodontitis            | Gingival sulcus epithelial cells | Unpublished |
| AZ     | Periodontitis            | Gingival sulcus epithelial cells | Unpublished |
| BA     | Refractory Periodontitis | Subgingival                      | (7)         |
| BB     | Refractory Periodontitis | Subgingival                      | (13)        |
| BD     | Refractory Periodontitis | Subgingival                      | (7)         |
| BE     | Health                   | Gingival sulcus epithelial cells | (13)        |
| BF     | Noma                     | Subgingival                      | (14)        |
| BH     | Refractory Periodontitis | Subgingival                      | (7)         |
| BI     | Refractory Periodontitis | Subgingival                      | (13)        |
| BJ     | Refractory Periodontitis | Subgingival                      | (13)        |
| BK     | Refractory Periodontitis | Subgingival                      | (13)        |
| BL     | Health                   | Gingival sulcus epithelial cells | (13)        |
| BM     | Refractory Periodontitis | Subgingival                      | (13)        |
| BN     | Refractory Periodontitis | Subgingival                      | (13)        |
| BO     | Refractory Periodontitis | Subgingival                      | (7)         |
| BP     | Refractory Periodontitis | Subgingival                      | (13)        |
| BQ     | Refractory Periodontitis | Subgingival                      | (13)        |
| BR     | Health                   | Gingival sulcus epithelial cells | Unpublished |
| BS     | Periodontitis            | Gingival sulcus epithelial cells | Unpublished |
| BT     | Periodontitis            | Gingival sulcus epithelial cells | Unpublished |
| BU     | Periodontitis            | Gingival sulcus epithelial cells | Unpublished |
| BV     | Periodontitis            | Subgingival                      | Unpublished |

|     |                          |                           |             |
|-----|--------------------------|---------------------------|-------------|
| BW  | Periodontitis            | Subgingival               | Unpublished |
| BX  | Periodontitis            | Subgingival               | Unpublished |
| BY  | Noma                     | Subgingival               | (14)        |
| BZ  | Noma                     | Subgingival               | (14)        |
| CA  | Noma                     | Subgingival               | (14)        |
| CB  | Noma                     | Subgingival               | (14)        |
| CD  | Refractory Periodontitis | Subgingival               | (7)         |
| CE  | Periodontitis            | Subgingival               | (7)         |
| CG  | Refractory Periodontitis | Subgingival               | (7)         |
| CH  | Periodontitis            | Subgingival               | (13)        |
| CI  | Refractory Periodontitis | Subgingival               | (13)        |
| CJ  | Refractory Periodontitis | Subgingival               | (13)        |
| CK  | Refractory Periodontitis | Subgingival               | (13)        |
| CMC | Ventilator Pneumonia     | Bronchial Alveolar Lavage | (3)         |
| CN  | Periodontitis            | Subgingival               | Unpublished |
| CR  | Periodontitis            | Subgingival               | Unpublished |
| CS  | Periodontitis            | Subgingival               | (13)        |
| CT  | Health                   | Dorsum tongue             | (10)        |
| CU  | Periodontitis            | Subgingival               | Unpublished |
| CW  | Health                   | Dorsum tongue             | (10)        |
| CX  | Periodontitis            | Subgingival               | Unpublished |
| CY  | Periodontitis            | Subgingival               | (13)        |
| CZ  | Periodontitis            | Subgingival               | (13)        |
| DA  | Periodontitis            | Subgingival               | (13)        |
| DB  | Periodontitis            | Subgingival               | (13)        |
| DC  | Periodontitis            | Subgingival               | (13)        |
| DD  | Periodontitis            | Subgingival               | (13)        |

|    |               |                                  |             |
|----|---------------|----------------------------------|-------------|
| DE | Caries        | Tooth                            | Unpublished |
| DF | Caries        | Tooth                            | Unpublished |
| DG | Caries        | Tooth                            | Unpublished |
| DM | Periodontitis | Subgingival                      | (13)        |
| DN | Halitosis     | Dorsum tongue                    | (10)        |
| DO | Halitosis     | Dorsum tongue                    | (10)        |
| DP | Halitosis     | Dorsum tongue                    | (10)        |
| DQ | Halitosis     | Dorsum tongue                    | (10)        |
| DR | Halitosis     | Dorsum tongue                    | (10)        |
| DS | Caries        | Tooth                            | Unpublished |
| DT | Caries        | Tooth                            | Unpublished |
| DU | Periodontitis | Subgingival                      | (13)        |
| DV | Periodontitis | Subgingival                      | (13)        |
| DW | ANUG          | Subgingival                      | (13)        |
| DX | NUP           | Subgingival                      | (15)        |
| DY | NUP           | Subgingival                      | (15)        |
| DZ | NUP           | Subgingival                      | (15)        |
| EA | NUP           | Subgingival                      | (15)        |
| ED | Health        | Gingival sulcus epithelial cells | Unpublished |
| EE | NUP           | Subgingival                      | (15)        |
| EF | NUP           | Subgingival                      | (15)        |
| EG | Health        | Subgingival                      | Unpublished |
| EH | Health        | Gingival sulcus epithelial cells | Unpublished |
| EI | Health        | Gingival sulcus epithelial cells | Unpublished |
| EJ | Health        | Gingival sulcus epithelial cells | Unpublished |
| EK | Health        | Gingival sulcus epithelial cells | Unpublished |
| EL | Health        | Gingival sulcus epithelial cells | Unpublished |

|    |                     |                                  |             |
|----|---------------------|----------------------------------|-------------|
| EM | Health              | Gingival sulcus epithelial cells | Unpublished |
| EN | NUP                 | Subgingival                      | (15)        |
| EO | NUP                 | Subgingival                      | (15)        |
| EP | Health              | Gingival sulcus epithelial cells | Unpublished |
| EQ | NUP                 | Subgingival                      | (15)        |
| ES | NUP                 | Subgingival                      | (15)        |
| EU | Periodontitis       | Gingival sulcus epithelial cells | Unpublished |
| EV | NUP                 | Subgingival                      | (15)        |
| EW | NUP                 | Subgingival                      | (15)        |
| EX | NUP                 | Subgingival                      | (15)        |
| EX | NUP                 | Subgingival                      | (15)        |
| EY | Periodontitis       | Gingival sulcus epithelial cells | Unpublished |
| EZ | Periodontitis       | Gingival sulcus epithelial cells | Unpublished |
| FB | Odontogenic Abscess | Pus                              | Unpublished |
| FC | Noma                | Subgingival                      | (14)        |
| FE | Noma                | Subgingival                      | (14)        |
| FF | Noma                | Subgingival                      | (14)        |
| FG | Noma                | Subgingival                      | (14)        |
| FH | Noma                | Subgingival                      | (14)        |
| FI | ANUG                | Subgingival                      | Unpublished |
| FJ | ANUG                | Subgingival                      | Unpublished |
| FK | ANUG                | Subgingival                      | Unpublished |
| FL | Odontogenic Abscess | Pus                              | Unpublished |
| FM | Health              | Dorsum tongue                    | (10)        |
| FN | Health              | Dorsum tongue                    | (10)        |
| FO | Health              | Dorsum tongue                    | (10)        |
| FP | Health              | Dorsum tongue                    | (10)        |



|    |                              |                                       |             |
|----|------------------------------|---------------------------------------|-------------|
| FQ | Halitosis                    | Dorsum tongue                         | (10)        |
| FR | Halitosis                    | Dorsum tongue                         | (10)        |
| FS | Halitosis                    | Dorsum tongue                         | (10)        |
| FU | Odontogenic Abscess          | Pus                                   | Unpublished |
| FV | Odontogenic Abscess          | Pus                                   | Unpublished |
| FW | Odontogenic Abscess          | Pus                                   | Unpublished |
| FX | NUP                          | Subgingival                           | (15)        |
| FY | NUP                          | Subgingival                           | (15)        |
| FZ | Oral Squamous Cell Carcinoma | Surface swab contralateral non lesion | Unpublished |
| GA | Health                       | Buccal                                | (2)         |
| GB | Health                       | Supragingival                         | (2)         |
| GC | Health                       | Vestibule                             | (2)         |
| GD | Health                       | Dorsum tongue                         | (2)         |
| GE | Health                       | Hard Palate                           | (2)         |
| GF | Periodontitis                | Subgingival                           | (13)        |
| GG | Health                       | Lateral tongue                        | (2)         |
| GH | Health                       | Subgingival                           | (2)         |
| GI | Health                       | Tonsil                                | (2)         |
| GJ | Health                       | Dorsum tongue                         | (2)         |
| GK | Health                       | Lateral tongue                        | (2)         |
| GL | Health                       | Buccal                                | (2)         |
| GM | Health                       | Hard Palate                           | (2)         |
| GN | Health                       | Soft Palate                           | (2)         |
| GO | Health                       | Supragingival                         | (2)         |
| GP | Health                       | Subgingival                           | (2)         |
| GQ | Health                       | Vestibule                             | (2)         |
| GR | Health                       | Tonsil                                | (2)         |

|    |        |                |             |
|----|--------|----------------|-------------|
| GS | Health | Soft Palate    | (2)         |
| GT | Caries | Tooth          | Unpublished |
| GU | Caries | Tooth          | Unpublished |
| GV | Caries | Tooth          | Unpublished |
| GW | Caries | Tooth          | Unpublished |
| GX | Caries | Tooth          | Unpublished |
| GY | Health | Dorsum tongue  | (2)         |
| GZ | Health | Lateral tongue | (2)         |
| HA | Health | Buccal         | (2)         |
| HB | Health | Hard Palate    | (2)         |
| HC | Health | Soft Palate    | (2)         |
| HD | Health | Supragingival  | (2)         |
| HE | Health | Subgingival    | (2)         |
| HF | Health | Vestibule      | (2)         |
| HG | Health | Tonsil         | (2)         |
| HH | Health | Hard Palate    | (2)         |
| HI | Health | Lateral tongue | (2)         |
| HJ | Health | Buccal         | (2)         |
| HK | Health | Dorsum tongue  | (2)         |
| HL | Health | Soft Palate    | (2)         |
| HM | Health | Supragingival  | (2)         |
| HN | Health | Subgingival    | (2)         |
| HO | Health | Vestibule      | (2)         |
| HP | Health | Tonsil         | (2)         |
| HQ | Caries | Tooth          | Unpublished |
| HR | Caries | Tooth          | Unpublished |
| HS | Caries | Tooth          | Unpublished |

|    |                     |                |             |
|----|---------------------|----------------|-------------|
| HT | Caries              | Tooth          | Unpublished |
| HU | Caries              | Tooth          | Unpublished |
| HV | Health              | Dorsum tongue  | (2)         |
| HW | Health              | Lateral tongue | (2)         |
| HX | Health              | Buccal         | (2)         |
| HY | Health              | Hard Palate    | (2)         |
| HZ | Health              | Soft Palate    | (2)         |
| IA | Health              | Supragingival  | (2)         |
| IB | Health              | Subgingival    | (2)         |
| IC | Health              | Vestibule      | (2)         |
| ID | Health              | Tonsil         | (2)         |
| IG | Odontogenic Abscess | Pus            | Unpublished |
| IH | Odontogenic Abscess | Pus            | Unpublished |
| II | Odontogenic Abscess | Pus            | Unpublished |
| IJ | Odontogenic Abscess | Pus            | Unpublished |
| IK | Caries              | Tooth          | Unpublished |
| IL | Caries              | Tooth          | Unpublished |
| IM | Caries              | Tooth          | Unpublished |
| IN | Caries              | Tooth          | Unpublished |
| IO | Caries              | Tooth          | Unpublished |
| IP | Caries              | Tooth          | Unpublished |
| IQ | Caries              | Tooth          | Unpublished |
| IR | Caries              | Tooth          | Unpublished |
| IS | Caries              | Tooth          | Unpublished |
| IT | Caries              | Tooth          | Unpublished |
| IU | Caries              | Tooth          | Unpublished |
| IV | Caries              | Tooth          | Unpublished |

|    |                     |             |             |
|----|---------------------|-------------|-------------|
| IW | Caries              | Tooth       | Unpublished |
| IX | Caries              | Tooth       | Unpublished |
| IY | Caries              | Tooth       | Unpublished |
| IZ | Caries              | Tooth       | Unpublished |
| JA | Caries              | Tooth       | Unpublished |
| JB | Caries              | Tooth       | Unpublished |
| JC | Caries              | Tooth       | Unpublished |
| JD | Caries              | Tooth       | Unpublished |
| JE | Caries              | Tooth       | Unpublished |
| JF | Caries              | Tooth       | Unpublished |
| JH | Noma                | Subgingival | Unpublished |
| JI | Noma                | Subgingival | Unpublished |
| JJ | Caries              | Tooth       | (5)         |
| JK | Periodontitis HIV + | Subgingival | (1)         |
| JL | Periodontitis HIV + | Subgingival | (1)         |
| JM | Periodontitis HIV + | Subgingival | (1)         |
| JN | Periodontitis HIV + | Subgingival | (1)         |
| JO | Periodontitis HIV + | Subgingival | (1)         |
| JP | Periodontitis HIV + | Subgingival | (1)         |
| JQ | Noma                | Subgingival | Unpublished |
| JR | Caries              | Tooth       | (5)         |
| JS | ANUG                | Subgingival | Unpublished |
| JT | ANUG                | Subgingival | Unpublished |
| JU | ANUG                | Subgingival | Unpublished |
| JV | ANUG                | Subgingival | Unpublished |
| JW | Noma                | Subgingival | Unpublished |
| KA | Health              | Saliva      | Unpublished |

|    |                              |                                       |             |
|----|------------------------------|---------------------------------------|-------------|
| KC | Caries                       | Tooth                                 | Unpublished |
| KE | Caries                       | Tooth                                 | Unpublished |
| KG | Noma                         | Subgingival                           | Unpublished |
| KH | Noma                         | Subgingival                           | Unpublished |
| KJ | Noma                         | Subgingival                           | Unpublished |
| KK | Noma                         | Subgingival                           | Unpublished |
| KL | Noma                         | Subgingival                           | Unpublished |
| KP | Oral Squamous Cell Carcinoma | Surface swab lesion                   | Unpublished |
| KQ | Oral Squamous Cell Carcinoma | Surface swab contralateral non lesion | Unpublished |
| KV | Noma                         | Subgingival                           | Unpublished |
| KZ | Oral Squamous Cell Carcinoma | Surface swab lesion                   | Unpublished |
| LA | Oral Squamous Cell Carcinoma | Surface swab contralateral non lesion | Unpublished |
| LB | Oral Squamous Cell Carcinoma | Surface swab lesion                   | Unpublished |
| LC | Oral Squamous Cell Carcinoma | Surface swab contralateral non lesion | Unpublished |
| LD | Alveolar osteitis            | Extraction socket                     | Unpublished |
| LE | Alveolar osteitis            | Extraction socket                     | Unpublished |
| LV | Periodontitis HIV + LGE      | Subgingival                           | (2)         |
| LW | Periodontitis HIV + LGE      | Subgingival                           | (2)         |
| LX | Caries                       | Tooth                                 | (5)         |
| LY | Caries                       | Tooth                                 | (5)         |
| LZ | Caries                       | Tooth                                 | (5)         |
| MA | Caries                       | Tooth                                 | (5)         |
| MD | Endodontic infection         | Pulp canal & chamber                  | Unpublished |
| ME | Periodontitis HIV +          | Subgingival                           | (2)         |
| MF | Periodontitis HIV +          | Subgingival                           | (2)         |
| MG | Periodontitis HIV +          | Subgingival                           | (2)         |
| MH | Periodontitis HIV +          | Subgingival                           | (2)         |

|      |                              |                                       |             |
|------|------------------------------|---------------------------------------|-------------|
| MI   | Periodontitis HIV +          | Subgingival                           | (2)         |
| MJ   | Periodontitis HIV +          | Subgingival                           | (2)         |
| MK   | Refractory Periodontitis     | Subgingival                           | Unpublished |
| ML   | Refractory Periodontitis     | Subgingival                           | Unpublished |
| MM   | Alveolar osteitis            | Extraction socket                     | Unpublished |
| MN   | Alveolar osteitis            | Extraction socket                     | Unpublished |
| MO   | Alveolar osteitis            | Extraction socket                     | Unpublished |
| MP   | Alveolar osteitis            | Extraction socket                     | Unpublished |
| MQ   | Oral Squamous Cell Carcinoma | Surface swab contralateral non lesion | Unpublished |
| MR   | Oral Squamous Cell Carcinoma | Surface swab contralateral non lesion | Unpublished |
| MS   | Alveolar osteitis            | Extraction socket                     | Unpublished |
| MT   | Alveolar osteitis            | Extraction socket                     | Unpublished |
| MU   | Alveolar osteitis            | Extraction socket                     | Unpublished |
| MW   | Oral Squamous Cell Carcinoma | Surface swab lesion                   | Unpublished |
| MX   | Oral Squamous Cell Carcinoma | Surface swab lesion                   | Unpublished |
| MY   | Alveolar osteitis            | Extraction socket                     | Unpublished |
| MZ   | Alveolar osteitis            | Extraction socket                     | Unpublished |
| NA   | Lichen Planus                | Lesion swab                           | Unpublished |
| NB   | Lichen Planus                | Lesion swab                           | Unpublished |
| NC   | Oral Squamous Cell Carcinoma | Surface swab lesion                   | Unpublished |
| NCAR | Oral Bacteremia              | Blood                                 | Unpublished |
| ND   | Oral Squamous Cell Carcinoma | Surface swab lesion                   | Unpublished |
| NE   | Oral Squamous Cell Carcinoma | Surface swab lesion                   | Unpublished |
| NF   | Lichen Planus                | Lesion swab                           | Unpublished |
| NG   | Lichen Planus                | Lesion swab                           | Unpublished |
| NH   | Alveolar osteitis            | Extraction socket                     | Unpublished |
| NI   | Alveolar osteitis            | Extraction socket                     | Unpublished |

|     |                              |                      |             |
|-----|------------------------------|----------------------|-------------|
| NJ  | Lichen Planus                | Lesion swab          | Unpublished |
| NK  | Oral Squamous Cell Carcinoma | Surface swab lesion  | Unpublished |
| NL  | Oral Squamous Cell Carcinoma | Surface swab lesion  | Unpublished |
| NM  | Health                       | Saliva               | Unpublished |
| NN  | Health                       | Saliva               | Unpublished |
| NO  | Health                       | Saliva               | Unpublished |
| NP  | Endodontic infection         | Pulp canal & chamber | Unpublished |
| NW  | Oral Squamous Cell Carcinoma | Surface swab lesion  | Unpublished |
| NZM | Periodontitis                | Subgingival          | (4)         |
| OU  | Caries                       | Tooth                | Unpublished |
| OV  | Caries                       | Tooth                | Unpublished |
| OW  | Caries                       | Tooth                | Unpublished |
| OX  | Caries                       | Tooth                | Unpublished |
| OZ  | Caries                       | Tooth                | Unpublished |
| PA  | Caries                       | Tooth                | Unpublished |
| PG  | Caries                       | Tooth                | Unpublished |
| PH  | Caries                       | Tooth                | Unpublished |
| PI  | Caries                       | Tooth                | Unpublished |
| PJ  | Caries                       | Tooth                | Unpublished |
| PK  | Caries                       | Tooth                | Unpublished |
| PL  | Caries                       | Tooth                | Unpublished |
| PM  | Caries                       | Tooth                | Unpublished |
| PN  | Caries                       | Tooth                | Unpublished |
| QG  | Caries                       | Tooth                | Unpublished |
| QH  | Caries                       | Tooth                | Unpublished |
| QI  | Caries                       | Tooth                | Unpublished |
| QJ  | Caries                       | Tooth                | Unpublished |

|    |        |       |             |
|----|--------|-------|-------------|
| QK | Caries | Tooth | Unpublished |
| QL | Caries | Tooth | Unpublished |
| QM | Caries | Tooth | Unpublished |
| QN | Caries | Tooth | Unpublished |
| QO | Caries | Tooth | Unpublished |
| QP | Caries | Tooth | Unpublished |
| QR | Caries | Tooth | Unpublished |
| QS | Caries | Tooth | Unpublished |
| QT | Caries | Tooth | Unpublished |
| QU | Caries | Tooth | Unpublished |
| QV | Caries | Tooth | Unpublished |
| QW | Caries | Tooth | Unpublished |
| QX | Caries | Tooth | Unpublished |
| QY | Caries | Tooth | Unpublished |
| QZ | Caries | Tooth | Unpublished |
| RA | Caries | Tooth | Unpublished |
| RB | Caries | Tooth | Unpublished |
| RC | Caries | Tooth | Unpublished |
| RD | Caries | Tooth | Unpublished |
| RE | Caries | Tooth | Unpublished |
| RF | Caries | Tooth | Unpublished |
| RG | Caries | Tooth | Unpublished |
| RH | Caries | Tooth | Unpublished |
| RI | Caries | Tooth | Unpublished |
| RJ | Caries | Tooth | Unpublished |
| RK | Caries | Tooth | Unpublished |
| RL | Caries | Tooth | Unpublished |



|    |                      |                      |             |
|----|----------------------|----------------------|-------------|
| RM | Caries               | Tooth                | Unpublished |
| RN | Caries               | Tooth                | Unpublished |
| RO | Caries               | Tooth                | Unpublished |
| RP | Caries               | Tooth                | Unpublished |
| RQ | Caries               | Tooth                | Unpublished |
| RR | Caries               | Tooth                | Unpublished |
| RS | Caries               | Tooth                | Unpublished |
| RT | Caries               | Tooth                | Unpublished |
| RU | Caries               | Tooth                | Unpublished |
| RV | Caries               | Tooth                | Unpublished |
| RW | Caries               | Tooth                | Unpublished |
| RX | Caries               | Tooth                | Unpublished |
| RY | Caries               | Tooth                | Unpublished |
| RZ | Caries               | Tooth                | Unpublished |
| SA | Caries               | Tooth                | Unpublished |
| SB | Caries               | Tooth                | Unpublished |
| SC | Caries               | Tooth                | Unpublished |
| SD | Caries               | Tooth                | Unpublished |
| SE | Caries               | Tooth                | Unpublished |
| SF | Caries               | Tooth                | Unpublished |
| SG | Caries               | Tooth                | Unpublished |
| SH | Caries               | Tooth                | Unpublished |
| SI | Endodontic infection | Pulp canal & chamber | Unpublished |
| SJ | Endodontic infection | Pulp canal & chamber | Unpublished |
| SK | Endodontic infection | Pulp canal & chamber | Unpublished |
| SL | Caries               | Tooth                | Unpublished |
| SM | Caries               | Tooth                | Unpublished |

|    |                      |                      |             |
|----|----------------------|----------------------|-------------|
| SN | Caries               | Tooth                | Unpublished |
| SO | Caries               | Tooth                | Unpublished |
| SP | Caries               | Tooth                | Unpublished |
| SQ | Endodontic infection | Pulp canal & chamber | Unpublished |
| SR | Endodontic infection | Pulp canal & chamber | Unpublished |
| SS | Endodontic infection | Pulp canal & chamber | Unpublished |
| ST | Endodontic infection | Pulp canal & chamber | Unpublished |
| SU | Endodontic infection | Pulp canal & chamber | Unpublished |
| SV | Endodontic infection | Pulp canal & chamber | Unpublished |
| SW | Endodontic infection | Pulp canal & chamber | Unpublished |
| SX | Endodontic infection | Pulp canal & chamber | Unpublished |
| SY | Endodontic infection | Pulp canal & chamber | Unpublished |
| TK | Caries               | Tooth                | Unpublished |
| TN | Caries               | Tooth                | Unpublished |
| TO | Caries               | Tooth                | Unpublished |
| TP | Caries               | Tooth                | Unpublished |
| TQ | Caries               | Tooth                | Unpublished |
| TR | Caries               | Tooth                | Unpublished |
| TS | Caries               | Tooth                | Unpublished |
| TT | Caries               | Tooth                | Unpublished |
| TU | Endodontic infection | Pulp canal & chamber | Unpublished |
| TV | Endodontic infection | Pulp canal & chamber | Unpublished |
| TW | Endodontic infection | Pulp canal & chamber | Unpublished |
| TX | Endodontic infection | Pulp canal & chamber | Unpublished |
| TY | Endodontic infection | Pulp canal & chamber | Unpublished |
| TZ | Endodontic infection | Pulp canal & chamber | Unpublished |
| UC | Endodontic infection | Pulp canal & chamber | Unpublished |

|    |                          |                      |             |
|----|--------------------------|----------------------|-------------|
| UD | Endodontic infection     | Pulp canal & chamber | Unpublished |
| UE | Endodontic infection     | Pulp canal & chamber | Unpublished |
| UF | Endodontic infection     | Pulp canal & chamber | Unpublished |
| UG | Endodontic infection     | Pulp canal & chamber | Unpublished |
| UH | Endodontic infection     | Pulp canal & chamber | Unpublished |
| UK | Endodontic infection     | Pulp canal & chamber | Unpublished |
| UL | Endodontic infection     | Pulp canal & chamber | Unpublished |
| UO | Aggressive periodontitis | Subgingival          | (8)         |
| UP | Aggressive periodontitis | Subgingival          | (8)         |
| UQ | Aggressive periodontitis | Subgingival          | (8)         |
| UR | Aggressive periodontitis | Subgingival          | (8)         |
| US | Endodontic infection     | Pulp canal & chamber | Unpublished |
| UT | Endodontic infection     | Pulp canal & chamber | Unpublished |
| UU | Endodontic infection     | Pulp canal & chamber | Unpublished |
| UV | Endodontic infection     | Pulp canal & chamber | Unpublished |
| UW | Aggressive periodontitis | Subgingival          | (8)         |
| UX | Aggressive periodontitis | Subgingival          | (8)         |
| UY | Endodontic infection     | Pulp canal & chamber | Unpublished |
| UZ | Endodontic infection     | Pulp canal & chamber | Unpublished |
| VA | Endodontic infection     | Pulp canal & chamber | Unpublished |
| VB | Aggressive periodontitis | Subgingival          | (8)         |
| VC | Aggressive periodontitis | Subgingival          | (8)         |
| VD | Aggressive periodontitis | Subgingival          | (8)         |
| VE | Aggressive periodontitis | Subgingival          | (8)         |
| VF | Aggressive periodontitis | Subgingival          | (8)         |
| VG | Aggressive periodontitis | Subgingival          | (8)         |
| VH | Endodontic infection     | Pulp canal & chamber | Unpublished |

|    |                          |                      |             |
|----|--------------------------|----------------------|-------------|
| VI | Endodontic infection     | Pulp canal & chamber | Unpublished |
| VJ | Endodontic infection     | Pulp canal & chamber | Unpublished |
| VK | Endodontic infection     | Pulp canal & chamber | Unpublished |
| VL | Endodontic infection     | Pulp canal & chamber | Unpublished |
| VM | Aggressive periodontitis | Subgingival          | (8)         |
| VO | Endodontic infection     | Pulp canal & chamber | Unpublished |
| VP | Aggressive periodontitis | Subgingival          | (8)         |
| VQ | Endodontic infection     | Pulp canal & chamber | Unpublished |
| VR | Endodontic infection     | Pulp canal & chamber | Unpublished |
| VS | Endodontic infection     | Pulp canal & chamber | Unpublished |
| VT | Endodontic infection     | Pulp canal & chamber | Unpublished |
| VU | Aggressive periodontitis | Subgingival          | (8)         |
| WB | Endodontic infection     | Pulp canal & chamber | Unpublished |
| WC | Endodontic infection     | Pulp canal & chamber | Unpublished |
| WD | Endodontic infection     | Pulp canal & chamber | Unpublished |
| WE | Endodontic infection     | Pulp canal & chamber | Unpublished |
| WF | Endodontic infection     | Pulp canal & chamber | Unpublished |
| WI | Endodontic infection     | Pulp canal & chamber | Unpublished |
| WJ | Endodontic infection     | Pulp canal & chamber | Unpublished |
| WK | Endodontic infection     | Pulp canal & chamber | Unpublished |
| WL | Endodontic infection     | Pulp canal & chamber | Unpublished |
| WM | Endodontic infection     | Pulp canal & chamber | Unpublished |
| WN | Endodontic infection     | Pulp canal & chamber | Unpublished |
| WQ | Endodontic infection     | Pulp canal & chamber | Unpublished |
| WR | Endodontic infection     | Pulp canal & chamber | Unpublished |
| WS | Endodontic infection     | Pulp canal & chamber | Unpublished |
| WT | Endodontic infection     | Pulp canal & chamber | Unpublished |

|           |                    |                      |             |
|-----------|--------------------|----------------------|-------------|
| WU        | ANUG               | Subgingival          | Unpublished |
| WV        | ANUG               | Subgingival          | Unpublished |
| WW        | ANUG               | Subgingival          | Unpublished |
| WWC_C1AKM | Caries             | Tooth                | (11)        |
| WWC_C1ALM | Caries             | Tooth                | (11)        |
| WWC_C1MKM | Caries             | Tooth                | (11)        |
| WWC_C1MLM | Caries             | Tooth                | (11)        |
| WWC_C2AKM | Caries             | Tooth                | (11)        |
| WWC_C2ALM | Caries             | Tooth                | (11)        |
| WWC_C2MKM | Caries             | Tooth                | (11)        |
| WWC_C2MLM | Caries             | Tooth                | (11)        |
| WWC_C3AKM | Caries             | Tooth                | (11)        |
| WWC_C3ALM | Caries             | Tooth                | (11)        |
| WWC_C3MKM | Caries             | Tooth                | (11)        |
| WWC_C3MLM | Caries             | Tooth                | (11)        |
| WWC_C4AKM | Caries             | Tooth                | (11)        |
| WWC_C4ALM | Caries             | Tooth                | (11)        |
| WWC_C4MKM | Caries             | Tooth                | (11)        |
| WWC_C4MLM | Caries             | Tooth                | (11)        |
| WWC_C5AKM | Caries             | Tooth                | (11)        |
| WWC_C5ALM | Caries             | Tooth                | (11)        |
| WWC_C5MKM | Caries             | Tooth                | (11)        |
| WWC_C5MLM | Caries             | Tooth                | (11)        |
| WWD_7A    | Health             | Denture surface 7hr  | Unpublished |
| WWD_7B    | Health             | Denture surface 7hr  | Unpublished |
| WWD_7C    | Health             | Denture surface 7hr  | Unpublished |
| WWE_MCE1  | Endodontic abscess | Pulp canal & chamber | (12)        |

|           |                    |                      |      |
|-----------|--------------------|----------------------|------|
| WWE_MCE10 | Endodontic abscess | Pulp canal & chamber | (12) |
| WWE_MCE2  | Endodontic abscess | Pulp canal & chamber | (12) |
| WWE_MCE3  | Endodontic abscess | Pulp canal & chamber | (12) |
| WWE_MCE4  | Endodontic abscess | Pulp canal & chamber | (12) |
| WWE_MCE5  | Endodontic abscess | Pulp canal & chamber | (12) |
| WWE_MCE6  | Endodontic abscess | Pulp canal & chamber | (12) |
| WWE_MCE7  | Endodontic abscess | Pulp canal & chamber | (12) |
| WWE_MCE8  | Endodontic abscess | Pulp canal & chamber | (12) |
| WWE_MCE9  | Endodontic abscess | Pulp canal & chamber | (12) |
| WWP_P2PA  | Periodontitis      | Subgingival          | (6)  |
| WWP_P2PB  | Periodontitis      | Subgingival          | (6)  |
| WWP_P2PC  | Periodontitis      | Subgingival          | (6)  |
| WWP_P4GA  | Periodontitis      | Subgingival          | (6)  |
| WWP_P4GB  | Periodontitis      | Subgingival          | (6)  |
| WWP_P4GC  | Periodontitis      | Subgingival          | (6)  |
| WWP_P4PA  | Periodontitis      | Subgingival          | (6)  |
| WWP_P4PB  | Periodontitis      | Subgingival          | (6)  |
| WWP_P4PC  | Periodontitis      | Subgingival          | (6)  |
| WWP_SS1   | Periodontitis      | Subgingival          | (6)  |
| WWP_SS10  | Periodontitis      | Subgingival          | (6)  |
| WWP_SS2   | Periodontitis      | Subgingival          | (6)  |
| WWP_SS3   | Periodontitis      | Subgingival          | (6)  |
| WWP_SS4   | Periodontitis      | Subgingival          | (6)  |
| WWP_SS5   | Periodontitis      | Subgingival          | (6)  |
| WWP_SS6   | Periodontitis      | Subgingival          | (6)  |
| WWP_SS7   | Periodontitis      | Subgingival          | (6)  |
| WWP_SS8   | Periodontitis      | Subgingival          | (6)  |

|         |                      |                      |             |
|---------|----------------------|----------------------|-------------|
| WWP_SS9 | Periodontitis        | Subgingival          | (6)         |
| WX      | Endodontic infection | Pulp canal & chamber | Unpublished |
| WY      | Endodontic infection | Pulp canal & chamber | Unpublished |
| WZ      | Endodontic infection | Pulp canal & chamber | Unpublished |
| XA      | Endodontic infection | Pulp canal & chamber | Unpublished |
| XB      | Endodontic infection | Pulp canal & chamber | Unpublished |
| XC      | Endodontic infection | Pulp canal & chamber | Unpublished |
| XF      | Endodontic infection | Pulp canal & chamber | Unpublished |
| XG      | Endodontic infection | Pulp canal & chamber | Unpublished |
| XH      | Endodontic infection | Pulp canal & chamber | Unpublished |
| XI      | Endodontic infection | Pulp canal & chamber | Unpublished |
| XN      | Endodontic infection | Pulp canal & chamber | Unpublished |
| XP      | Endodontic infection | Pulp canal & chamber | Unpublished |
| XQ      | Endodontic infection | Pulp canal & chamber | Unpublished |
| XU      | Endodontic infection | Pulp canal & chamber | Unpublished |
| XV      | Endodontic infection | Pulp canal & chamber | Unpublished |
| XZ      | Endodontic infection | Pulp canal & chamber | Unpublished |
| YA      | Endodontic infection | Pulp canal & chamber | Unpublished |
| YB      | Endodontic infection | Pulp canal & chamber | Unpublished |
| YC      | Endodontic infection | Pulp canal & chamber | Unpublished |
| YF      | Endodontic infection | Pulp canal & chamber | Unpublished |
| YG      | Endodontic infection | Pulp canal & chamber | Unpublished |
| YH      | Endodontic infection | Pulp canal & chamber | Unpublished |
| YI      | Endodontic infection | Pulp canal & chamber | Unpublished |
| YJ      | Endodontic infection | Pulp canal & chamber | Unpublished |
| YK      | Endodontic infection | Pulp canal & chamber | Unpublished |
| YL      | Endodontic infection | Pulp canal & chamber | Unpublished |

|    |                      |                      |             |
|----|----------------------|----------------------|-------------|
| YM | Endodontic infection | Pulp canal & chamber | Unpublished |
| YO | Endodontic infection | Pulp canal & chamber | Unpublished |
| YP | Endodontic infection | Pulp canal & chamber | Unpublished |
| YQ | Endodontic infection | Pulp canal & chamber | Unpublished |
| YR | Endodontic infection | Pulp canal & chamber | Unpublished |
| YS | Endodontic infection | Pulp canal & chamber | Unpublished |
| YT | Endodontic infection | Pulp canal & chamber | Unpublished |
| YU | Endodontic infection | Pulp canal & chamber | Unpublished |
| YV | Endodontic infection | Pulp canal & chamber | Unpublished |
| YW | Endodontic infection | Pulp canal & chamber | Unpublished |
| YX | Endodontic infection | Pulp canal & chamber | Unpublished |
| YY | Endodontic infection | Pulp canal & chamber | Unpublished |
| YZ | Endodontic infection | Pulp canal & chamber | Unpublished |
| ZA | Endodontic infection | Pulp canal & chamber | Unpublished |

1 <sup>a</sup> Abbreviations: ANUG, acute necrotizing ulcerative gingivitis; HIV +, human immunodeficiency virus positive;

2 LGE, linear gingival erythema; and NUP, necrotizing ulcerative periodontitis.

### 3 **References**

4

5 1. **Aas, J. A., S. M. Barbuto, T. Alpagot, I. Olsen, F. E. Dewhirst, and B. J. Paster.**

6 2007. Subgingival plaque microbiota in HIV positive patients. *J Clin Periodontol* **34**:189-  
7 95.

8 2. **Aas, J. A., B. J. Paster, L. N. Stokes, I. Olsen, and F. E. Dewhirst.** 2005. Defining the  
9 normal bacterial flora of the oral cavity. *J Clin Microbiol* **43**:5721-32.

10 3. **Bahrani-Mougeot, F. K., B. J. Paster, S. Coleman, S. Barbuto, M. T. Brennan, J.**

11 **Noll, T. Kennedy, P. C. Fox, and P. B. Lockhart.** 2007. Molecular analysis of oral and



- 1 respiratory bacterial species associated with ventilator-associated pneumonia. *J Clin*  
2 *Microbiol* **45**:1588-93.
- 3 4. **Choi, B. K., B. J. Paster, F. E. Dewhirst, and U. B. Gobel.** 1994. Diversity of  
4 cultivable and uncultivable oral spirochetes from a patient with severe destructive  
5 periodontitis. *Infect Immun* **62**:1889-95.
- 6 5. **Corby, P. M., W. A. Bretz, T. C. Hart, N. J. Schork, J. Wessel, J. Lyons-Weiler, and**  
7 **B. J. Paster.** 2007. Heritability of oral microbial species in caries-active and caries-free  
8 twins. *Twin Res Hum Genet* **10**:821-8.
- 9 6. **de Lillo, A., F. P. Ashley, R. M. Palmer, M. A. Munson, L. Kyriacou, A. J.**  
10 **Weightman, and W. G. Wade.** 2006. Novel subgingival bacterial phylotypes detected  
11 using multiple universal polymerase chain reaction primer sets. *Oral Microbiol Immunol*  
12 **21**:61-8.
- 13 7. **Dewhirst, F. E., M. A. Tamer, R. E. Ericson, C. N. Lau, V. A. Levanos, S. K. Boches,**  
14 **J. L. Galvin, and B. J. Paster.** 2000. The diversity of periodontal spirochetes by 16S  
15 rRNA analysis. *Oral Microbiol Immunol* **15**:196-202.
- 16 8. **Faveri, M., M. P. Mayer, M. Feres, L. C. de Figueiredo, F. E. Dewhirst, and B. J.**  
17 **Paster.** 2008. Microbiological diversity of generalized aggressive periodontitis by 16S  
18 rRNA clonal analysis. *Oral Microbiol Immunol* **23**:112-8.
- 19 9. **Kansai, E., Johansson, I., Lu, S. C., Kressin, N. R., Nunn, M. E., Kent, R. &**  
20 **Tanner, A. C. R.** 2010 Microbial Risk Markers for Childhood Caries in Pediatricians'  
21 Offices. *J Dent Res* **in press**.

- 1 10. **Kazor, C. E., P. M. Mitchell, A. M. Lee, L. N. Stokes, W. J. Loesche, F. E. Dewhirst,**  
2 **and B. J. Paster.** 2003. Diversity of bacterial populations on the tongue dorsa of patients  
3 with halitosis and healthy patients. *J Clin Microbiol* **41**:558-63.
- 4 11. **Munson, M. A., A. Banerjee, T. F. Watson, and W. G. Wade.** 2004. Molecular  
5 analysis of the microflora associated with dental caries. *Journal of Clinical Microbiology*  
6 **42**:3023-9.
- 7 12. **Munson, M. A., T. Pitt-Ford, B. Chong, A. Weightman, and W. G. Wade.** 2002.  
8 Molecular and cultural analysis of the microflora associated with endodontic infections. *J*  
9 *Dent Res* **81**:761-6.
- 10 13. **Paster, B. J., S. K. Boches, J. L. Galvin, R. E. Ericson, C. N. Lau, V. A. Levanos, A.**  
11 **Sahasrabudhe, and F. E. Dewhirst.** 2001. Bacterial diversity in human subgingival  
12 plaque. *J Bacteriol* **183**:3770-83.
- 13 14. **Paster, B. J., W. A. Falkler Jr, Jr., C. O. Enwonwu, E. O. Idigbe, K. O. Savage, V.**  
14 **A. Levanos, M. A. Tamer, R. L. Ericson, C. N. Lau, and F. E. Dewhirst.** 2002.  
15 Prevalent bacterial species and novel phylotypes in advanced noma lesions. *J Clin*  
16 *Microbiol* **40**:2187-91.
- 17 15. **Paster, B. J., M. K. Russell, T. Alpagot, A. M. Lee, S. K. Boches, J. L. Galvin, and F.**  
18 **E. Dewhirst.** 2002. Bacterial diversity in necrotizing ulcerative periodontitis in HIV-  
19 positive subjects. *Ann Periodontol* **7**:8-16.
- 20
